# Supplementary material for: QRS–T Angle and High-Sensitivity Troponin in the Early Diagnosis of Non–ST Segment Elevation Myocardial Infarction in the Emergency Department
Source: Research Square preprint supplement (doi:10.21203/rs.3.rs-7600884/v1), 2025-10-23
Supplement: Supplementary file 1 [file 517c3bf0d73dd258360c6327.docx]

Table 1. Baseline QTc Interval, Frontal QRS–T Angle, and Serial High-Sensitivity Troponin T Levels

|  |  | Mean | SD | Percentiles | | |
| --- | --- | --- | --- | --- | --- | --- |
| N | 25 | Median | 75 |
| QTc Value | 604 | 447.2 | 39.7 | 420.0 | 442.0 | 467.0 |
| QRS-T Angle Value | 604 | 72.4 | 63.2 | 21.0 | 55.0 | 111.8 |
| First Troponin Value | 604 | 315.2 | 649.0 | 30.0 | 96.1 | 316.1 |
| Second Troponin Value | 604 | 485.8 | 1066.6 | 47.0 | 151.0 | 467.1 |
| Third Troponin Value | 568 | 618.9 | 1087.9 | 62.5 | 202.0 | 640.5 |

Values are presented as mean ± standard deviation (SD), median, and interquartile range (25th–75th percentile). N indicates the number of patients with available measurements.

Table 2. Correlation of QTc Interval and QRS–T Angle with Serial High-Sensitivity Troponin Measurements

|  | | QRS-T angle value | | | First Troponin value | | | Second Troponin value | | | Third Troponin value | | |
| --- | --- | --- | --- | --- | --- | --- | --- | --- | --- | --- | --- | --- | --- |
| r | P | N | r | P | N | r | P | N | r | P | N |
|  | QTc value | 0.299 | **0.001** | 604 | 0.159 | **0.001** | 604 | 0.157 | **0.001** | 604 | 0.123 | **0.003** | 568 |
| QRS-T angle value |  |  |  | 0.161 | **0.001** | 604 | 0.150 | **0.001** | 604 | 0.155 | **0.001** | 568 |
| First Troponin value |  |  |  |  |  |  | 0.905 | **0.001** | 601 | 0.776 | **0.001** | 566 |
| Second Troponin value |  |  |  |  |  |  |  |  |  | 0.912 | **0.001** | 567 |

Values represent Spearman’s rank correlation coefficients (r). p values are two-sided. N indicates the number of paired observations included in each analysis.

Table 3. QTc interval and QRS–T angle across troponin-based risk groups

|  | First Troponin value |  | Mean | SD | Percentiles | | | | | |  |
| --- | --- | --- | --- | --- | --- | --- | --- | --- | --- | --- | --- |
|  | N | 25 | | Median | | 75 | | P* |
| QTc value | low risk | 79 | 433.3 | 30.5 | 410.0 | | 434.0a | | 450.0 | | **0.002** |
| moderate risk | 133 | 446.7 | 42.2 | 42.0 | | 439.0b | | 465.5 | |  |
| high risk | 392 | 450.3 | 39.9 | 422.0 | | 445.0b | | 472.0 | |  |
| QRS-T angle value | low risk | 79 | 39.8 | 43.6 | 11.0 | | 20.0a | | 55.0 | | **0.001** |
| moderate risk | 133 | 81.2 | 64.5 | 28.5 | | 64.0b | | 118.5 | |  |
| high risk | 392 | 76.5 | 64.2 | 22.0 | | 60.5b | | 119.0 | |  |
|  | Second Troponin value |  |  |  | |  | | | | |  |
|  |  |  | |  | |  |  |
| QTc value | low risk | 57 | 432.0 | 30.6 | | 408.5 | | 433.0a | | 447.0 | **0.006** |
| moderate risk | 107 | 446.7 | 34.2 | | 424.0 | | 443.0b | | 467.0 |  |
| high risk | 440 | 449.4 | 41.6 | | 420.0 | | 444.0b | | 471.0 |  |
| QRS-T angle value | low risk | 57 | 34.9 | 39.9 | | 9.0 | | 15.0a | | 51.0 | **0.001** |
| moderate risk | 107 | 81.8 | 68.1 | | 29.0 | | 62.0b | | 117.0 |  |
| high risk | 440 | 75.1 | 63.0 | | 22.3 | | 60.0b | | 118.8 |  |
|  | Third Troponin value |  |  |  | |  | | | | |  |
|  |  | |  | |  |  |
| QTc value | low risk | 41 | 433.6 | 34.9 | | 408.5 | | 431.0a | | 446.0 | **0.022** |
| moderate risk | 85 | 447.7 | 37.4 | | 428.5 | | 446.0b | | 467.0 |  |
| high risk | 442 | 449.5 | 40.4 | | 421.8 | | 444.0b | | 471.0 |  |
| QRS-T angle value | low risk | 41 | 37.2 | 44.8 | | 9.0 | | 15.0a | | 50.5 | **0.001** |
| moderate risk | 85 | 74.6 | 68.8 | | 23.0 | | 48.0b | | 115.0 |  |
| high risk | 442 | 77.0 | 63.0 | | 24.0 | | 61.5b | | 118.3 |  |

Values are presented as mean ± standard deviation (SD), median, and interquartile range (25th–75th percentile). Risk groups were defined according to high-sensitivity troponin T levels: low (3–14 ng/L), intermediate (14–52 ng/L), and high (>52 ng/L). p values were obtained using the Kruskal–Wallis test. Post-hoc pairwise comparisons were performed with the Dunn–Bonferroni test; different superscripts (a, b) denote statistically significant differences between groups (adjusted p<0.05). N indicates the number of patients in each group.

Table 4: ROC analysis of QRS–T angle for low vs. intermediate/high troponin groups

|  | **Measurement** | **AUC** | **SE** | **P value** | **Cutoff** | **Sensitivity (%)** | **Specificity (%)** |
| --- | --- | --- | --- | --- | --- | --- | --- |
| First Troponin value | QTc value | 0.615 | 0.032 | **0.001** | 434.5 | 60.8 | 52.0 |
| QRS-T angle value | 0.690 | 0.030 | **0.001** | 24.5 | 75.4 | 65.7 |
| Second Troponin value | QTc value | 0.628 | 0.036 | **0.001** | 434.5 | 60.3 | 54.4 |
| QRS-T angle value | 0.713 | 0.032 | **0.001** | 24.5 | 74.4 | 59.6 |
| Third Troponin value | QTc value | 0.629 | 0.044 | **0.006** | 433.5 | 62.2 | 53.7 |
| QRS-T angle value | 0.706 | 0.040 | **0.001** | 19.5 | 79.5 | 58.5 |

Values represent the area under the receiver operating characteristic (ROC) curve (AUC) with standard error (SE) and p values. p values test the null hypothesis that AUC = 0.5. Optimal cutoff points were determined using the Youden index. Sensitivity and specificity are expressed as percentages. N: number of patients included in each analysis.

Tablo 5: Coronary vessel involvement, QTc, QRS–T, troponin values

|  | Coronary artery involvement |  | Mean | SD | Percentiles | | |  |
| --- | --- | --- | --- | --- | --- | --- | --- | --- |
|  | N | 25 | Median | 75 | P |
| QTC value | None | 118 | 442.1 | 39.4 | 418.0 | 440.0a | 456.0 | **0.044** |
| Single vessel | 110 | 440.3 | 34.0 | 416.0 | 441.0ab | 462.0 |  |
| Multiple vessels | 378 | 450.8 | 41.0 | 422.0 | 443.5b | 473.0 |  |
| QRS-T angle value | None | 119 | 64.7 | 71.6 | 11.0 | 34.0a | 110.0 | **0.001** |
| Single vessel | 110 | 61.2 | 52.5 | 21.0 | 48.0b | 88.0 |  |
| Multiple vessels | 376 | 78.0 | 62.7 | 25.0 | 65.0c | 120.0 |  |
| First Troponin value | None | 116 | 155.5 | 241.4 | 11.6 | 54.6a | 198.4 | **0.001** |
| Single vessel | 111 | 227.3 | 848.8 | 22.9 | 63.7b | 173.4 |  |
| Multiple vessels | 377 | 390.2 | 656.6 | 42.8 | 134.0c | 422.8 |  |
| Second Troponin value | None | 115 | 188.9 | 361.9 | 13.9 | 68.6a | 186.8 | **0.001** |
| Single vessel | 111 | 369.8 | 907.3 | 36.5 | 106.1b | 239.3 |  |
| Multiple vessels | 378 | 610.1 | 1222.1 | 66.4 | 209.0c | 593.6 |  |
| Third Troponin value | None | 103 | 244.2 | 584.8 | 27.2 | 91.6a | 226.0 | **0.001** |
| Single vessel | 101 | 525.5 | 1042.3 | 49.2 | 140.0b | 422.5 |  |
| Multiple vessels | 364 | 750.9 | 1180.4 | 89.8 | 322.0c | 881.3 |  |

Values are presented as mean ± standard deviation (SD), median, and interquartile range (25th–75th percentile). Coronary vessel involvement was categorized as none, single-vessel disease, or multivessel disease based on coronary angiography findings. Comparisons were performed using the Kruskal–Wallis test; post-hoc pairwise comparisons were conducted with the Dunn–Bonferroni test. Different superscripts (a, b, c) indicate statistically significant differences between groups (adjusted p<0.05). N indicates the number of patients with available data for each measurement.

Table 6: The relationship between the QRS-T angle and 28-day mortality

|  | 28 day mortality | | | | | | | | | | | |  |
| --- | --- | --- | --- | --- | --- | --- | --- | --- | --- | --- | --- | --- | --- |
| None | | | | | | Present | | | | | |  |
|  | Mean | SD | Percentiles | | | |  | Mean | SD | Percentiles | | |  |
| N | 25 | Median | 75 | | N | 25 | Median | 75 | P |
| QRS–T angle | 588 | 70.87 | 62.37 | 20.00 | 53.00 | 109.75 | | 20 | 116.00 | 72.20 | 46.00 | 119.00 | 175.25 | **0.003** |
| Time to angiography (minutes) | 588 | 1033.67 | 1296.03 | 286.00 | 772.50 | 1187.25 | | 20 | 1896.90 | 3062.38 | 521.00 | 836.50 | 1545.50 | 0.148 |

Values are presented as mean ± standard deviation (SD), median, and interquartile range (25th–75th percentile). Comparisons between survivors and non-survivors were performed using the Mann–Whitney U test. p values ≤0.05 were considered statistically significant. N indicates the number of patients in each group.
